# Supplementary material for: Tumour kinome re-wiring governs resistance to palbociclib in oestrogen receptor positive breast cancers, highlighting new therapeutic modalities
Source: PubMed Central journal article supplement (PMC7299844; doi:10.1038/s41388-020-1284-6), 2020-04-19

**a**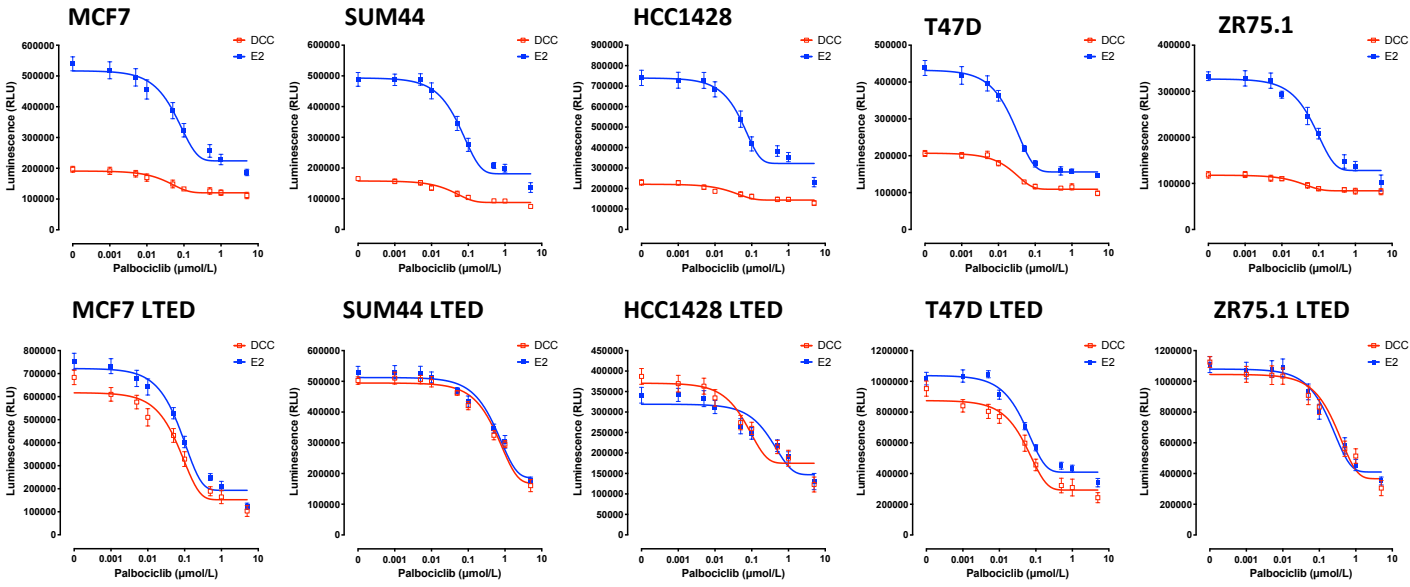**b**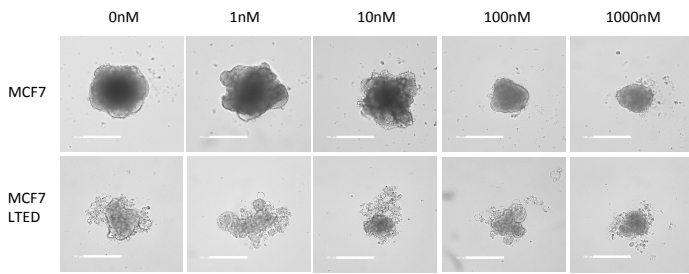**d**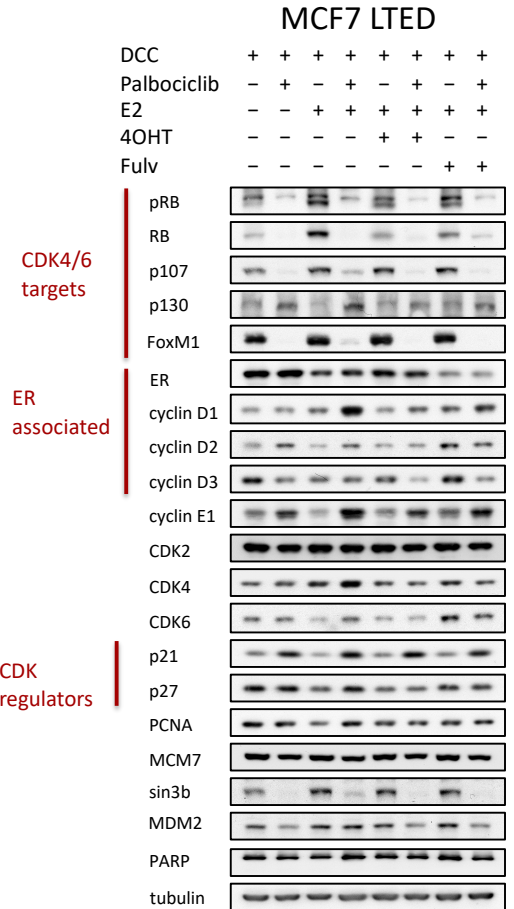**c**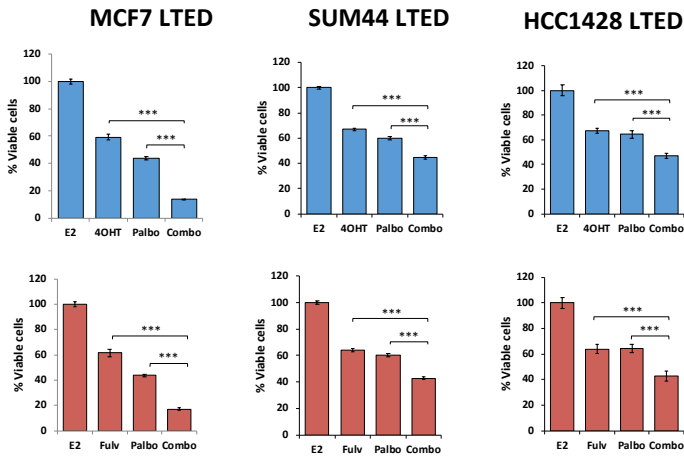

Supplement: 41388_2020_1284_MOESM1_ESM.pdf [file 41388_2020_1284_MOESM1_ESM.pdf]
