# Supplementary material for: Tumour kinome re-wiring governs resistance to palbociclib in oestrogen receptor positive breast cancers, highlighting new therapeutic modalities
Source: PubMed Central journal article supplement (PMC7299844; doi:10.1038/s41388-020-1284-6), 2020-04-19
Supplement: 41388_2020_1284_MOESM6_ESM.pdf [file 41388_2020_1284_MOESM6_ESM.pdf]

**a** **Hallmark pathways**  
MCF7 LTED<sup>PaIboR</sup> versus MCF7 LTED

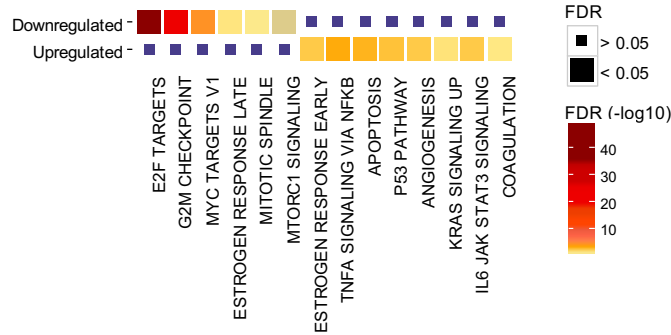

| source | term name                                    | term ID       | n. of term genes | n. of query genes | n. of common genes | corrected p-value |
|--------|----------------------------------------------|---------------|------------------|-------------------|--------------------|-------------------|
| BP     | cellular response to stimulus                | GO:0051716    | 7303             | 57                | 38                 | 2.01e-02          |
| BP     | body fluid secretion                         | GO:0007589    | 91               | 57                | 5                  | 1.61e-02          |
| BP     | system development                           | GO:0048731    | 4669             | 57                | 30                 | 7.29e-03          |
| BP     | animal organ development                     | GO:0048513    | 3415             | 57                | 25                 | 8.61e-03          |
| BP     | gland development                            | GO:0048732    | 437              | 57                | 9                  | 1.10e-02          |
| BP     | epithelium development                       | GO:0060429    | 1262             | 57                | 15                 | 5.62e-03          |
| BP     | cell cycle                                   | GO:0007049    | 1829             | 57                | 17                 | 2.86e-02          |
| BP     | mitotic cell cycle                           | GO:0000278    | 985              | 57                | 16                 | 3.30e-05          |
| BP     | mitotic cell cycle process                   | GO:1903047    | 821              | 57                | 12                 | 6.67e-03          |
| BP     | positive regulation of developmental process | GO:0051094    | 1274             | 57                | 14                 | 3.22e-02          |
| BP     | growth                                       | GO:0040007    | 968              | 57                | 12                 | 4.58e-02          |
| source | term name                                    | term ID       | n. of term genes | n. of query genes | n. of common genes | corrected p-value |
| cor    | Protein databases (CORUM protein complexes)  |               |                  |                   |                    |                   |
| cor    | PDZK1-NHERF1-EZR complex                     | CORUM:6793    | 3                | 13                | 2                  | 1.50e-02          |
| source | term name                                    | term ID       | n. of term genes | n. of query genes | n. of common genes | corrected p-value |
| rea    | Biological pathways (Reactome)               |               |                  |                   |                    |                   |
| rea    | Signaling by Nuclear Receptors               | R-HSA-9006931 | 198              | 41                | 7                  | 3.24e-03          |
| rea    | ESR-mediated signaling                       | R-HSA-8939211 | 155              | 41                | 6                  | 8.99e-03          |
| rea    | Estrogen-dependent gene expression           | R-HSA-9018519 | 149              | 41                | 6                  | 7.19e-03          |

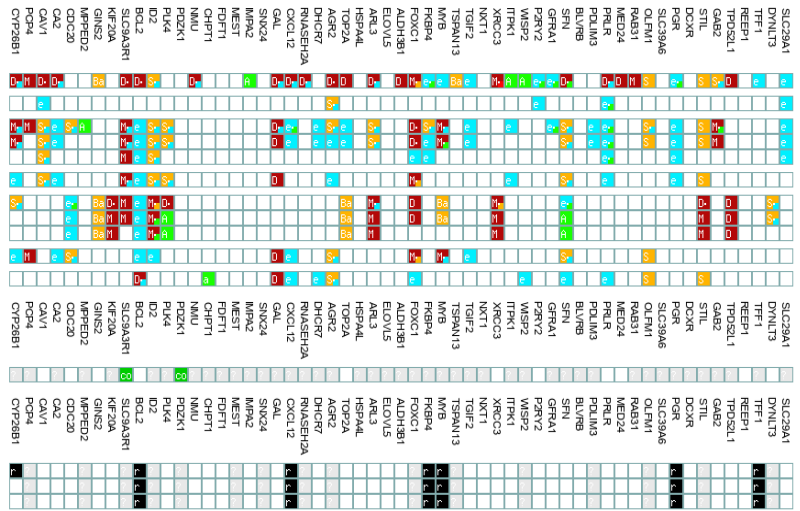

| source | term name                                                  | term ID      | n. of term genes | n. of query genes | n. of common genes | corrected p-value |
|--------|------------------------------------------------------------|--------------|------------------|-------------------|--------------------|-------------------|
| BP     | response to water                                          | GO:00009415  | 16               | 71                | 4                  | 9.76e-04          |
| BP     | response to hydrostatic pressure                           | GO:0051959   | 7                | 71                | 3                  | 5.46e-03          |
| BP     | biological adhesion                                        | GO:0022610   | 1330             | 71                | 19                 | 6.55e-04          |
| BP     | cell adhesion                                              | GO:0007155   | 1323             | 71                | 18                 | 3.03e-03          |
| BP     | cell-cell adhesion                                         | GO:0098699   | 763              | 71                | 13                 | 1.18e-02          |
| BP     | regulation of cell adhesion                                | GO:0093255   | 628              | 71                | 14                 | 1.81e-04          |
| BP     | system development                                         | GO:0048731   | 4669             | 71                | 36                 | 3.79e-03          |
| BP     | negative regulation of cell adhesion                       | GO:0007162   | 242              | 71                | 8                  | 9.59e-03          |
| BP     | regulation of cell death                                   | GO:0010941   | 1645             | 71                | 19                 | 1.62e-02          |
| BP     | regulation of biological quality                           | GO:0065908   | 3633             | 71                | 29                 | 4.42e-02          |
| BP     | response to organic cyclic compound                        | GO:0014070   | 941              | 71                | 14                 | 2.26e-02          |
| BP     | response to endogenous stimulus                            | GO:0009719   | 1570             | 71                | 19                 | 8.13e-03          |
| BP     | multicellular organismal process                           | GO:0032501   | 7343             | 71                | 47                 | 4.26e-03          |
| BP     | developmental process                                      | GO:0032502   | 6118             | 71                | 43                 | 1.54e-03          |
| BP     | anatomical structure development                           | GO:0048856   | 5699             | 71                | 40                 | 6.82e-03          |
| BP     | multicellular organism development                         | GO:0002275   | 5232             | 71                | 38                 | 6.78e-03          |
| BP     | animal organ development                                   | GO:0048731   | 3415             | 71                | 31                 | 3.79e-03          |
| BP     | gland development                                          | GO:0048732   | 437              | 71                | 10                 | 1.40e-02          |
| BP     | cellular developmental process                             | GO:0048869   | 4229             | 71                | 32                 | 3.05e-02          |
| BP     | cell differentiation                                       | GO:0092154   | 4057             | 71                | 31                 | 4.59e-02          |
| BP     | myeloid leukocyte differentiation                          | GO:0000573   | 193              | 71                | 7                  | 2.28e-02          |
| BP     | positive regulation of metabolic process                   | GO:0098693   | 3294             | 71                | 28                 | 1.58e-02          |
| BP     | positive regulation of macromolecule metabolic process     | GO:0010604   | 3417             | 71                | 26                 | 4.06e-02          |
| BP     | positive regulation of nitrogen compound metabolic process | GO:0051173   | 2889             | 71                | 27                 | 5.18e-03          |
| BP     | positive regulation of cellular metabolic process          | GO:0033255   | 3001             | 71                | 28                 | 3.07e-03          |
| source | term name                                                  | term ID      | n. of term genes | n. of query genes | n. of common genes | corrected p-value |
| cor    | Protein databases (CORUM protein complexes)                |              |                  |                   |                    |                   |
| cor    | TFAP2C-Hyg-KDPB complex                                    | CORUM:6203   | 3                | 19                | 2                  | 4.95e-02          |
| source | term name                                                  | term ID      | n. of term genes | n. of query genes | n. of common genes | corrected p-value |
| rea    | Biological pathways (Reactome)                             |              |                  |                   |                    |                   |
| rea    | Signaling by NOTCH                                         | R-HSA-197118 | 126              | 54                | 7                  | 1.06e-03          |
| source | term name                                                  | term ID      | n. of term genes | n. of query genes | n. of common genes | corrected p-value |
| tf     | Regulatory motifs in DNA (TRANSFAC TFBS)                   |              |                  |                   |                    |                   |
| tf     | Factor: SPI1; motif: GGGGAGGGGG                            | TF:MI01303   | 7863             | 71                | 46                 | 3.75e-02          |
| tf     | Factor: SPI1; motif: GGGGAGGGGG; match class: 0            | TF:MI01303_0 | 7863             | 71                | 46                 | 3.75e-02          |

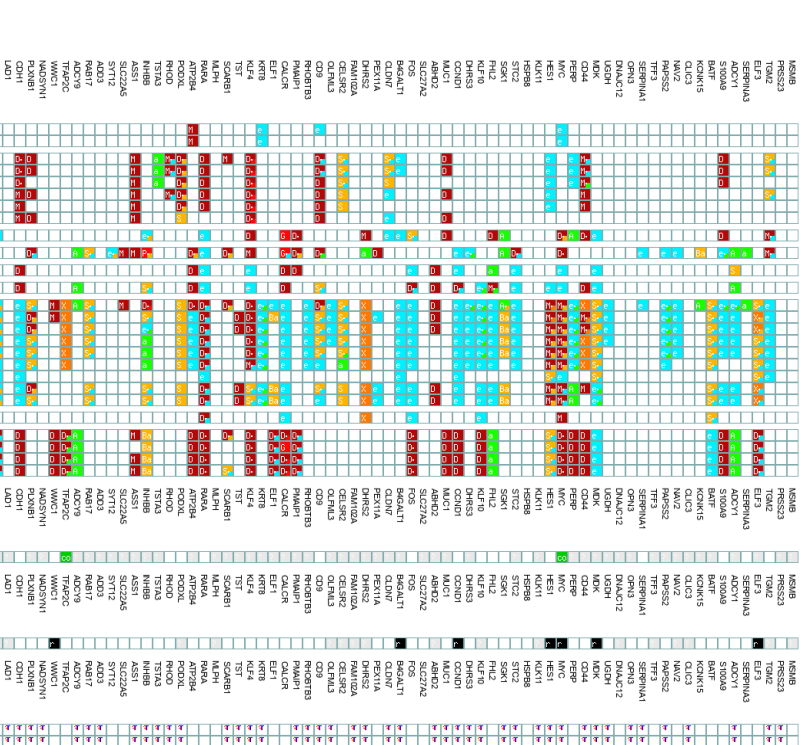

- [?] Gene Ontology ■ Biological process ■ Cellular component ■ Molecular function
- Inferred from experiment [IDA, IPI, IMP, IGI, IEP]
- Direct assay [IDA] / Mutant phenotype [IMP]
- Genetic interaction [IGI] / Physical interaction [IPI]
- Traceable author [TAS] / Non-traceable author [NAS] / Inferred by curator [IC]
- Expression pattern [IEP] / Sequence or structural similarity [ISS] / Genomic context [IGC]
- Biological aspect of ancestor [IBA] / Rapid divergence [IRD]
- Reviewed computational analysis [RCA] / Electronic annotation [IEA]
- No biological data [ND] / Not annotated or not in background [NA]
- Biological pathways ■ KEGG ■ Reactome
- [?] Regulatory motifs in DNA ■ TRANSFAC TFBS
- [?] Protein databases ■ Human Protein Atlas ■ CORUM protein complexes
- [?] Human Phenotype Ontology (sequence homologs in other species)
